# Supplementary material for: Associations of Early Childhood Manganese and Lead Coexposure with Neurodevelopment
Source: PubMed Central journal article supplement (PMC3261931; doi:10.1289/ehp.1003300), 2011-09-01
Supplement: ehp.1003300.s001.pdf [file ehp.1003300.s001.pdf]

## **Supplemental Material**

**Title:** Associations of Early Childhood Manganese and Lead Co-exposure with Neurodevelopment

**Author names:** Birgit Claus Henn<sup>1</sup>, Lourdes Schnaas<sup>2</sup>, Adrienne S. Ettinger<sup>1,3</sup>, Joel Schwartz<sup>1,4</sup>, Héctor Lamadrid-Figueroa<sup>5</sup>, Mauricio Hernández-Avila<sup>6</sup>, Chitra Amarasiriwardena<sup>4</sup>, Howard Hu<sup>7</sup>, David C. Bellinger<sup>1,8</sup>, Robert O. Wright<sup>1,4,7,9\*</sup>, Martha María Téllez-Rojo<sup>5\*</sup>

**Supplemental Material, Table 1. Sociodemographic Characteristics of Study Participants Included in Analyses of 12- and 24-Month Blood Metals**

| <b>Characteristics</b>                         | <b>Children Included in Analyses of:</b>  |                                           |
|------------------------------------------------|-------------------------------------------|-------------------------------------------|
|                                                | <b><u>12 Month Metals<sup>a</sup></u></b> | <b><u>24 Month Metals<sup>b</sup></u></b> |
|                                                | <b>Mean (SD) or %</b>                     | <b>Mean (SD) or %</b>                     |
| Sex (male, %)                                  | 51.3%                                     | 51.0%                                     |
| Birth weight (kg)                              | 3.1 (0.4)                                 | 3.1 (0.4)                                 |
| Estimated gestational age (weeks)              | 38.9 (1.3)                                | 38.9 (1.3)                                |
| Birth length (cm)                              | 49.9 (2.2)                                | 49.8 (2.3)                                |
| Head circumference (cm; delivery)              | 34.1 (1.5)                                | 34.1 (1.6)                                |
| Blood manganese (µg/l)                         |                                           |                                           |
| 12-month                                       | 24.7 (5.9)                                | 24.8 (6.0) <sup>e</sup>                   |
| 24-month                                       | 19.2 (6.8) <sup>c</sup>                   | 21.5 (7.4)                                |
| Blood lead (µg/dl)                             |                                           |                                           |
| Umbilical cord                                 | 4.2 (2.7) <sup>d</sup>                    | 4.7 (3.2) <sup>f</sup>                    |
| 12-month                                       | 5.1 (2.6)                                 | 5.1 (2.6) <sup>e</sup>                    |
| 24-month                                       | 4.8 (2.5) <sup>c</sup>                    | 5.0 (2.9)                                 |
| Hemoglobin (g/dl)                              |                                           |                                           |
| 12-month                                       | 11.9 (1.3)                                | 11.8 (1.3)                                |
| 24-month                                       | 12.6 (1.2)                                | 12.6 (1.1)                                |
| Bayley MDI Score (36-month) <sup>g</sup>       | 92.3 (9.1)                                | 93.3 (9.1)                                |
| Bayley PDI Score (36-month) <sup>g</sup>       | 94.9 (10.8)                               | 95.9 (10.9)                               |
| Maternal marital status (% married)            | 70.9%                                     | 72.4%                                     |
| Maternal IQ                                    | 87.8 (12.6)                               | 88.1 (13.1)                               |
| Maternal education (years)                     | 10.7 (2.7)                                | 10.7 (2.8)                                |
| Maternal age at delivery (years)               | 25.6 (5.3)                                | 25.9 (5.3)                                |
| Maternal whole blood lead (µg/dl) <sup>h</sup> | 6.9 (4.2)                                 | 7.5 (4.6)                                 |

a – Sample size is 275, except where noted    b – Sample size is 437, except where noted

c – n=266    d – n=183    e – n=267    f – n=278

g – n=250. Only 36-month Bayley scores provided for brevity; scores at other time points are

similar    h – Collected at 1-month postpartum

**Supplemental Material, Table 2. Crude Results from Mixed Models of 12- and 24-month Metals with Repeated Measures of Bayley Scores<sup>a</sup>**

| Exposure                                              | Effect Estimates for 12-month Metals <sup>b</sup> |                  | Effect Estimates for 24-month Metals <sup>c</sup> |                 |
|-------------------------------------------------------|---------------------------------------------------|------------------|---------------------------------------------------|-----------------|
|                                                       | Beta                                              | (95% CI)         | Beta                                              | (95% CI)        |
| MDI:                                                  |                                                   |                  |                                                   |                 |
| Manganese (quintile 1 <sup>d</sup> vs. quintiles 2-4) | -2.15                                             | (-4.14 to -0.16) | -0.08                                             | (-2.19 to 2.03) |
| Manganese (quintile 5 <sup>e</sup> vs. quintiles 2-4) | -0.86                                             | (-2.82 to 1.11)  | 0.43                                              | (-1.65 to 2.51) |
| Lead (µg/dl) <sup>f</sup>                             | -0.17                                             | (-0.50 to 0.16)  | -0.37                                             | (-0.76 to 0.03) |
| Manganese (quintile 1) * lead                         | -0.47                                             | (-1.45 to 0.51)  | 0.21                                              | (-0.80 to 1.22) |
| Manganese (quintile 5) * lead                         | -1.38                                             | (-2.32 to -0.45) | 0.15                                              | (-0.41 to 0.71) |
| PDI:                                                  |                                                   |                  |                                                   |                 |
| Manganese (quintile 1 vs. quintiles 2-4)              | 0.53                                              | (-1.23 to 2.30)  | -0.21                                             | (-2.07 to 1.65) |
| Manganese (quintile 5 vs. quintiles 2-4)              | -0.31                                             | (-2.05 to 1.42)  | 0.19                                              | (-1.64 to 2.01) |
| Lead (µg/dl)                                          | -0.32                                             | (-0.61 to -0.02) | -0.29                                             | (-0.64 to 0.05) |
| Manganese (quintile 1) * lead                         | 0.004                                             | (-0.87 to 0.88)  | 0.32                                              | (-0.57 to 1.21) |
| Manganese (quintile 5) * lead                         | -0.96                                             | (-1.79 to -0.13) | 0.27                                              | (-0.22 to 0.77) |

a – Effect estimates for 12-month metals are from repeated measures models that include Bayley scores at 12, 18, 24, 30, and 36 months. Effect estimates for 24-month metals are from repeated measures models that include Bayley scores at 24, 30, and 36 months.

- b – Number of subjects = 275. For MDI, number of observations = 1330; for PDI, number of observations = 1329
- c – Number of subjects = 437. For MDI and PDI, number of observations = 1240
- d – Blood manganese levels in quintile 1 range from 15.30 to 20.16  $\mu\text{g/l}$  at 12-months; 5.06 to 15.57  $\mu\text{g/l}$  at 24-months
- e – Blood manganese levels in quintile 5 range from 28.14 to 73.95  $\mu\text{g/l}$  at 12-months; 25.78 to 93.53  $\mu\text{g/l}$  at 24-months
- f – Blood lead centered at mean (12-months: 5.09  $\mu\text{g/dl}$ ; 24-months: 4.98  $\mu\text{g/dl}$ )
